# Supplementary material
Source: PubMed Central journal article supplement (PMC11113874)
Supplement: 18_2014_1697_MOESM1_ESM.pdf [file 18_2014_1697_MOESM1_ESM.pdf]

**A**

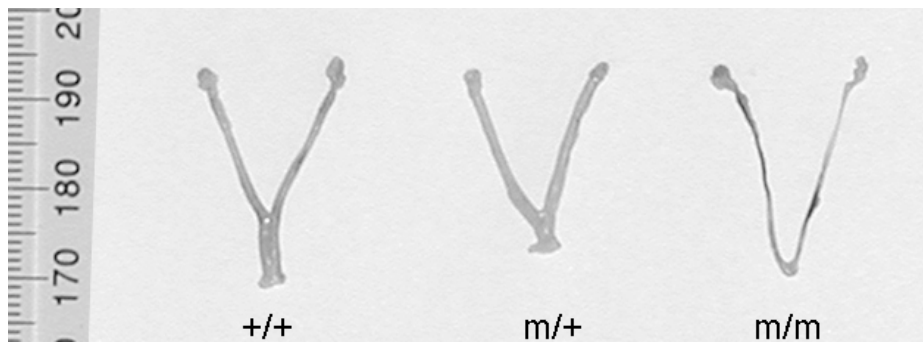

**B**

|                             | <b>Normal</b>           | <b>Obese</b>  |
|-----------------------------|-------------------------|---------------|
| <b>N</b>                    | 4 (+/+ = 1, fatt/+ = 3) | 3 (fatt/fatt) |
| <b>Testicle weight (mg)</b> | 206.20 ± 23.95          | 168.81 ± 6.24 |

**Supplementary figure 1: Reproductive organs of FATT mice.**

**(A)** Reproductive tracts of female wildtype (+/+), heterozygous (fatt/+) and obese (fatt/fatt) mice. **(B)** Weights of the right testicle of male mice.
